# Supplementary figures and images for: Development of a paper-immobilized yeast biosensor for the detection of physiological concentrations of doxycycline in technology-limited settings
Source: Royal Society of Chemistry journal article supplement (doi:10.1039/d0ay00001a), 2020-01-01

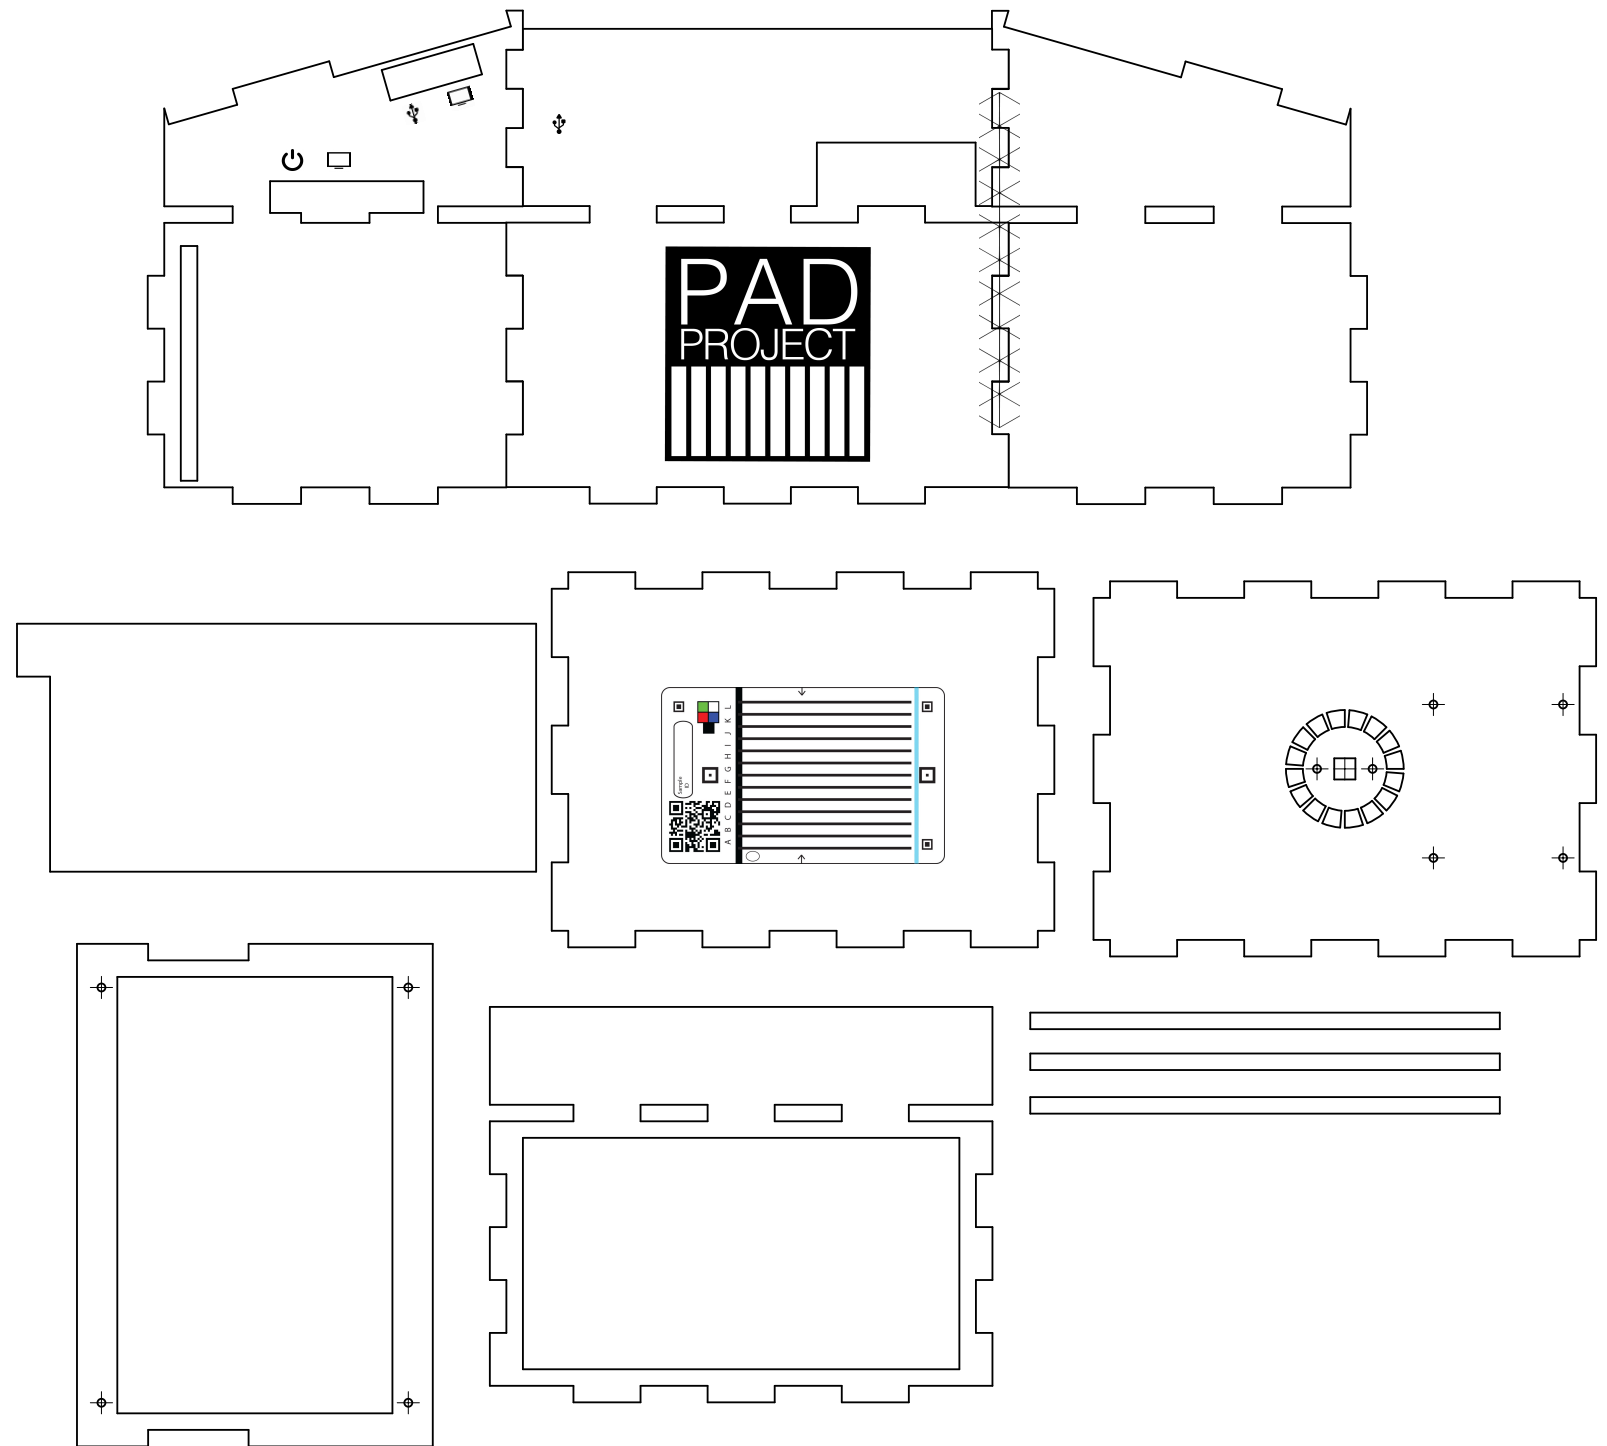

Supplement: d0ay00001a3.pdf [file d0ay00001a3.pdf]
